# 1 Comparison of 2D and 3D oxygen-enhanced MRI of the placenta

2

3 Penny L. Hubbard Cristinacce<sup>1</sup>, Minal Patel<sup>2</sup>, Alexander Oh<sup>1</sup>, Josephine H. Naish<sup>1</sup>, Edward D.  
4 Johnstone<sup>2</sup>, Emma Ingram<sup>2</sup>

5 <sup>1</sup> Division of Cardiovascular Sciences, Faculty of Biology, Medicine and Health, The University of  
6 Manchester, Manchester, M13 9PT, UK. <sup>2</sup> Division of Developmental Biology and Medicine, Faculty  
7 of Biology, Medicine and Health, The University of Manchester, Manchester, M13 9PT, UK.

8

## 9 Abstract

10 Oxygen-Enhanced Magnetic Resonance Imaging (OE-MRI) of the human placenta is potentially a  
11 sensitive marker of in vivo oxygenation. This methodological study shows that full coverage of the  
12 placenta is possible using 3D mapping of the change in longitudinal relaxation rate ( $\Delta R_1$ ), in a group  
13 of healthy pregnant subjects breathing elevated levels of oxygen.

14 Twelve pregnant subjects underwent a comparison of 2D and 3D OE-MRI.  $\Delta R_1$  was mapped for a  
15 single 2D slice (ss-2D), a single matched-slice from the 3D volume (ss-3D) and the full 3D volume  
16 (vol-3D).

17 The group-average median  $\Delta R_1$  values for ss-3D ( $0.023 \text{ s}^{-1}$ ) and vol-3D ( $0.022 \text{ s}^{-1}$ ) do not differ  
18 significantly from ss-2D ( $0.020 \text{ s}^{-1}$ ), when compared using a two-tailed paired t-test (ss-3D ( $p = 0.58$ )  
19 and vol-3D ( $p = 0.70$ )). However, median baseline  $T_1$  ( $T_{1b}$ ) for ss-2D was higher (1603 ms) than  $T_{1b}$  for  
20 ss-3D (1540 ms,  $p=0.07$ ) and significantly higher than vol-3D (1515 ms,  $p = 0.02$ ), when compared  
21 using a two-tailed paired t-test. In contrast with previous studies, no correlation of median  $\Delta R_1$  with  
22 gestation age at scan for the normal group (N = 10) was observed for ss-2D, likely due to the smaller  
23 gestational range.

24 Full volume OE-MRI maps reveal sensitivity to changes in  $\Delta R_1$ , with some participants showing an  
25 enhanced gradient in the intermediate space between the fetal and maternal sides of the placenta in  
26 the 3D data. This study shows that it is feasible to acquire whole placental volume OE-MRI data on a  
27 Philips 1.5 T MRI scanner. Further work is necessary to implement this increased coverage on the  
28 scanners of other vendors.

## 29 **Introduction**

30 Oxygen-Enhanced Magnetic Resonance Imaging (OE-MRI) of the human placenta has shown promise  
31 in examining placental function(1,2) and dysfunction(3) by being sensitive to in vivo oxygenation.

32 Abnormalities of placental function can be associated with fetal growth restriction (FGR), which  
33 leads to increased neonatal morbidity and mortality(4,5). Non-invasive measurements of placental  
34 hypoxia, which is associated with peripheral hypovascularity and increased vascular resistance(6),  
35 have the potential to identify FGR independent of fetal size.

36 The spin-lattice relaxation time ( $T_1$ ) of tissue is shortened when a subject breathes an elevated  
37 concentration of oxygen due to the paramagnetic effect of the additional dissolved oxygen. This  
38 change can be quantitatively assessed by examining the change in  $R_1$  (where  $R_1 = 1/T_1$ ), when a  
39 subject is switched from breathing air to 100% oxygen. Previous studies(1–3) have investigated this  
40 change by acquiring a single two-dimensional (2D)  $T_1$ -weighted slice through the placenta. Here we  
41 investigate the feasibility of obtaining whole placental oxygenation maps using a three-dimensional  
42 (3D) volume acquisition.

43 The aim of the study was to investigate whether a 3D volume acquisition shows the same  
44 quantitative trends in  $R_1$  as a single 2D slice, and to assess whether the increased volume covered  
45 could offer more sensitivity to placental heterogeneity. Full 3D coverage of the placenta may  
46 therefore allow a more comprehensive assessment of the placental oxygenation, as well as assessing  
47 known changes in gross tissue morphology.

48

## 49 **Methods**

50 Twelve subjects were recruited from St Mary's Hospital, Manchester, following informed consent  
51 (ethical approval REC:09/H1013/77 and 14/NW/0195). A summary of subject demographic and  
52 pregnancy outcome is given in Table 1. All subjects had normal uterine artery Doppler flow

53 (pulsatility index <95<sup>th</sup> centile at 22-24 weeks) and normal umbilical artery Doppler flow (pulsatility  
 54 index <95<sup>th</sup> percentile and positive end-diastolic flow)(9). Pregnancies were subsequently classified  
 55 as potentially abnormal based on an individualised birth ratio (IBR) <5<sup>th</sup> percentile (Gestation-related  
 56 Optimal Weight (10)). Two women did not meet the outcome criteria for assignment to the normal  
 57 group.

58

| Participant No. | Maternal Age Range (years) | BMI  | Gestational age at scan (days) | Placental position | Delivery Gestation (days) | Birth weight (g) | IBR (centile) |
|-----------------|----------------------------|------|--------------------------------|--------------------|---------------------------|------------------|---------------|
| 1               | 31-35                      | 24.3 | 196                            | Posterior          | 266                       | 2730             | 10.8          |
| 2               | 16-20                      | 29   | 169                            | Anterior           | 280                       | 3289             | 19.7          |
| 3               | 26-30                      | 36.9 | 176                            | Anterior           | 292                       | 2900             | 1.3*          |
| 4               | 27-30                      | 37.9 | 172                            | Posterior          | 265                       | 2900             | 17            |
| 5               | 36-40                      | 28.3 | 195                            | Posterior          | 270                       | 3420             | 59.4          |
| 6               | 21-25                      | 25   | 169                            | Anterior           | 282                       | 3674             | 41            |
| 7               | 36-40                      | 18.1 | 178                            | Posterior          | 273                       | 3682             | 81            |
| 8               | 26-30                      | 29.7 | 174                            | Posterior          | 236                       | 2660             | 98            |
| 9               | 26-30                      | 26.8 | 170                            | Anterior           | 275                       | 2500             | 1.4*          |
| 10              | 31-35                      | 17.4 | 176                            | Posterior          | 286                       | 2950             | 12            |
| 11              | 26-30                      | 21.3 | 106                            | Posterior          | 287                       | 3106             | 15            |
| 12              | 31-35                      | 21.5 | 194                            | Anterior           | 272                       | 2830             | 7             |

59 **Table 1** Subject demographic and pregnancy outcomes.

60 \*Abnormal based on an individualised birth ratio (IBR) <5<sup>th</sup> percentile.

61

62 Subjects were scanned using a 1.5T Philips Achieva MRI scanner (Philips Medical Systems Best, NL)  
 63 whilst supine with a left lateral tilt, to reduce aortocaval compression by the gravid uterus. A cardiac-  
 64 receiver coil was placed on the abdomen, covering the entire uterus. Non-rebreathing masks  
 65 (Intersurgical, Wokingham, UK) delivered medical air or 100% oxygen at a flow rate of 15 L/min to  
 66 the subjects and respiratory triggering was used to minimise motion from maternal breathing.

67 T<sub>2</sub>-weighted structural scans were used to determine the position of the placenta and plan the OE-  
68 MRI slices. Two inversion recovery OE-MRI protocols were performed: a 3D turbo-spin echo with  
69 half Fourier acquisition (3D-HASTE) for full placental coverage and a 2D turbo-spin echo (2D-TSE), as  
70 used in previous studies(2,3). The single 2D slice positioned perpendicular to the placenta at the  
71 level of the cord insertion. The orientation of the 3D-HASTE matched that of the 2D-TSE. For both  
72 OE-MRI protocols a T<sub>1</sub> map was calculated using a set of inversion recovery images, followed by a  
73 dynamic series of T<sub>1</sub>-weighted images during which the gas supply to the subject is switched from  
74 medical air (21%) to 100% oxygen in order to determine  $\Delta R_1$ .

### 75 ***3D OE-MRI protocol***

76 The majority of the data were acquired as follows: T<sub>1</sub> mapping data for the 3D-HASTE acquisitions  
77 consisted of 5 separate acquisitions with inversion times (TI): 50, 300, 1100, 2000 ms and no  
78 inversion pulse ( $\approx$ TR of 8 s, dependant on triggering), TE of 9 ms, 450 x 450 mm<sup>2</sup> FOV, matrix size 176  
79 x 176, voxel size 2.56 x 2.56 mm<sup>2</sup>, slice thickness 10 mm and 48 slices. Respiratory-triggered T<sub>1</sub>-  
80 weighted images were acquired dynamically at 40 time points with a temporal resolution of  $\sim$ 8 s  
81 (triggered off of every other breath), a TI of 1400 ms, with matching TE, FOV, matrix size, voxel size,  
82 slice thickness and number of slices. On the 10<sup>th</sup> dynamic, medical air was switched to 100% oxygen.  
83 On completion of the 3D dynamic acquisition, the supply was switched back to medical air and a 2-  
84 minute interval was observed to return the oxygen levels to baseline.

### 85 *Updated protocol:*

86 In 2 data sets (subjects 11 and 12) the first TI, matrix size and voxel size were changed to match the  
87 2D OE-MRI protocol below (60 ms, 128 x 128, 3.52 x 3.52 mm<sup>2</sup>).

### 88 ***2D OE-MRI protocol***

89 T<sub>1</sub> maps for the 2D-TSE acquisitions consisted of 5 inversions times (TI): 60, 300, 1100, 2000 ms and  
90 no TI. TR = TI + 8000 ms, TE of 5.4 ms, 450 x 450 mm<sup>2</sup> FOV, matrix size 128 x 128, voxel size 3.52 x

91 3.52 mm<sup>2</sup> and slice thickness 10 mm. Respiratory-triggered T<sub>1</sub>-weighted images were acquired  
92 dynamically at 40 time points with a temporal resolution of ~9.4 s and a TI of 1400 ms. On the 10<sup>th</sup>  
93 dynamic, medical air was switched to 100% oxygen.

#### 94 **Analysis**

95 Data were analysed using in-house Python code. An ROI was defined on the TI = 300 ms image,  
96 which incorporated the entire placenta as observed on each slice. Care was taken on the fetal side of  
97 the placenta and at each end to exclude areas likely to be affected by motion. A T<sub>1</sub> map was created  
98 by fitting a 3-parameter inversion recovery model to the data on a voxel-wise basis. The baseline/on  
99 air T<sub>1</sub> (T<sub>1b</sub>) was used to calculate the change in R<sub>1</sub> ( $\Delta R_1$ ) for each dynamic in the T<sub>1</sub>-weighted series, as  
100 described elsewhere(1). The single slice from the 2D OE-MRI (ss-2D) was compared with a single  
101 matched slice from the 3D volume (ss-3D) and the entire volume (vol-3D). The slice was matched by  
102 using the 3D slice with the closest slice location, according to the DICOM header and checked  
103 visually.

104 Voxel-wise  $\Delta R_1$  was calculated by taking the mean of the last 20 dynamics during the oxygen plateau  
105 and plotted as maps for both 2D and 3D data. Median and inter-quartile range (IQR) across the ROI  
106 of  $\Delta R_1$  and T<sub>1b</sub> were calculated for each subject, to limit the influence of outliers in the voxel-wise  
107 maps. The correlation was calculated for median and IQR  $\Delta R_1$  and T<sub>1b</sub> against gestational age at the  
108 scan, as in (1–3). The significance of the correlation was measured by using the Pearson correlation  
109 coefficient and presented as r and P values.

110 Bland–Altman plots were produced to quantitatively assess the agreement between the two  
111 methods, with 95% confidence intervals (limits of agreement) calculated as the mean difference  $\pm$   
112 (1.96  $\times$  standard deviation of the difference). The ROIs for subjects identified as outliers on these  
113 plots were inspected visually on the dynamic data.

114 Example videos of the 3D  $\Delta R_1$  maps can be found in the online supplementary material.

115 Two women who did not meet the outcome criteria for assignment to normal group (IBR <5<sup>th</sup>  
116 percentile) were removed from the gestational correlation analysis. All 12 subjects remained in all  
117 other comparisons.

## 118 Results

119 In Figure 1 the subject-average  $\Delta R_1$  is plotted against dynamic number for the ss-2D data and the vol-  
120 3D data. For both, the signal increases from baseline after the oxygen concentration is increased  
121 (10<sup>th</sup> dynamic) and plateaus by the 20<sup>th</sup> dynamic image. The ss-2D and vol-3D curves plateau around  
122 the same  $\Delta R_1$  with a similar standard deviation on each dynamic  $\Delta R_1$ .

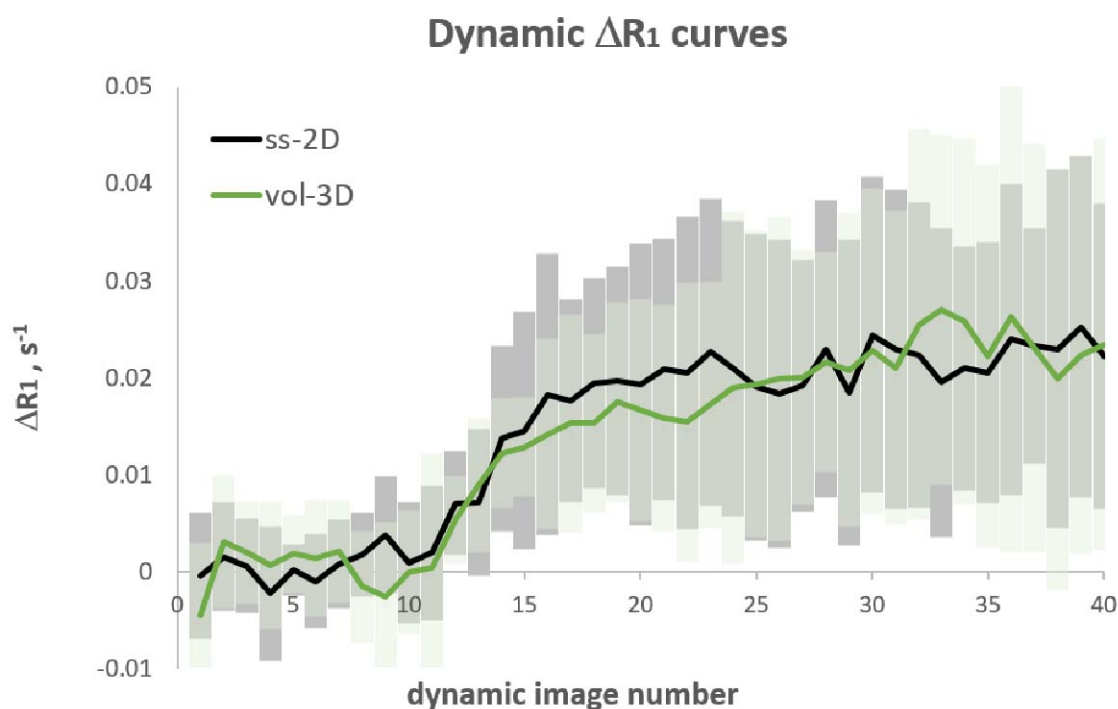

123

124 **Figure 1** Mean (line) and standard deviation of the dynamic  $\Delta R_1$  curves against dynamic image  
125 number for ss-2D (grey) compared with vol-3D (green).

126

127 Table 2 shows the group average median  $\Delta R_1$  for ss-2D ( $0.020 \text{ s}^{-1}$ ), ss-3D ( $0.023 \text{ s}^{-1}$ ) and vol-3D ( $0.022$   
 128  $\text{ s}^{-1}$ ) and that ss-3D ( $p = 0.58$ ) and vol-3D ( $p = 0.70$ ) do not differ significantly from ss-2D when  
 129 compared using a two-tailed paired t-test. However, median  $T_{1b}$  for ss-2D was higher (1603 ms) than  
 130  $T_{1b}$  for ss-3D (1540 ms,  $p=0.07$ ) and significantly higher than vol-3D (1515 ms,  $p = 0.02$ ), when  
 131 compared using a two-tailed paired t-test. Correlation of median  $\Delta R_1$  with gestation age at scan for  
 132 the normal group ( $N = 10$ ) revealed no trend with gestational age for ss-2D ( $p = 0.99$ ), ss-3D ( $p =$   
 133  $0.14$ ) and vol-3D ( $p = 0.24$ ).

|                                                           | <b>ss-2D</b>           | <b>ss-3D</b>                    | <b>vol-3D</b>                    |
|-----------------------------------------------------------|------------------------|---------------------------------|----------------------------------|
| <b>median <math>\Delta R_1, \text{ s}^{-1}</math></b>     | 0.020<br>(0.004-0.038) | 0.023<br>(-0.006-0.047)         | 0.022<br>(-0.003-0.048)          |
| <b>IQR <math>\Delta R_1, \text{ s}^{-1}</math></b>        | 0.024<br>(0.012-0.048) | 0.025<br>(0.015-0.045)          | 0.027<br>(0.015-0.038)           |
| <b>median <math>\Delta R_1 - \text{ gestation}</math></b> | r 0.00<br>p 0.99       | r -0.25<br>p 0.14               | r -0.17<br>p 0.24                |
| <b>IQR <math>\Delta R_1 - \text{ gestation}</math></b>    | r -0.18<br>p 0.23      | <b>r -0.45</b><br><b>p 0.03</b> | <b>r -0.64</b><br><b>p 0.005</b> |
| <b>median <math>T_{1b}, \text{ ms}</math></b>             | 1603<br>(1305-1679)    | 1540<br>(1418-1693)             | 1515<br>(1374-1723)              |
| <b>IQR <math>T_{1b}, \text{ ms}</math></b>                | 177<br>(86-275)        | 196<br>(122-338)                | 217<br>(152-340)                 |
| <b>median <math>T_{1b} - \text{ gestation}</math></b>     | r 0.22<br>p 0.17       | r 0.11<br>p 0.77                | r 0.00<br>p 0.99                 |
| <b>IQR <math>T_{1b} - \text{ gestation}</math></b>        | r 0.19<br>p 0.20       | <b>r -0.39</b><br><b>p 0.05</b> | <b>r -0.45</b><br><b>p 0.03</b>  |

134 **Table 2** Group average median and IQR  $\Delta R_1$  and  $T_{1b}$  values (12 subjects) and group average median  
 135 and IQR  $\Delta R_1$  and  $T_{1b}$  values against gestational age at scan (10 subjects) for ss-2D, ss-3D and vol-3D.

136

137 Table 2 also shows the inter-quartile range (IQR) of  $\Delta R_1$ , a measure of heterogeneity. The ss-2D  
 138 values are not significantly different from ss-3D ( $p = 0.94$ ) or vol-3D ( $p = 0.36$ ) when compared using  
 139 a two-tailed paired t-test. Correlation of IQR  $\Delta R_1$  with gestation age at scan revealed lower values at  
 140 longer gestation for the 3D data, ss-3D ( $p = 0.03$ ) and vol-3D ( $p = 0.005$ ).



141 A Bland–Altman plot shown in Figure 2 was used to investigate the agreement between  $\Delta R_1$  for ss-  
142 2D with ss-3D and vol-3D for the individual subjects. The plots show no outliers for ss-2D and ss-3D  
143 or ss-2D and vol-3D. The 2D - 3D difference in  $\Delta R_1$  is a smaller magnitude than the mean  $\Delta R_1$ . The  
144 average difference appears to decrease slightly as  $\Delta R_1$  increases. Figure 3 show the Bland–Altman  
145 plots comparing the  $T_{1b}$  values acquired from the 2D and 3D scans. The plots show a single outlier for  
146 ss-2D and ss-3D and no outliers for ss-2D and vol-3D. The mean difference shows the trend towards  
147 lower  $T_{1b}$  values for ss-3D and vol-3D, compared with ss-2D.

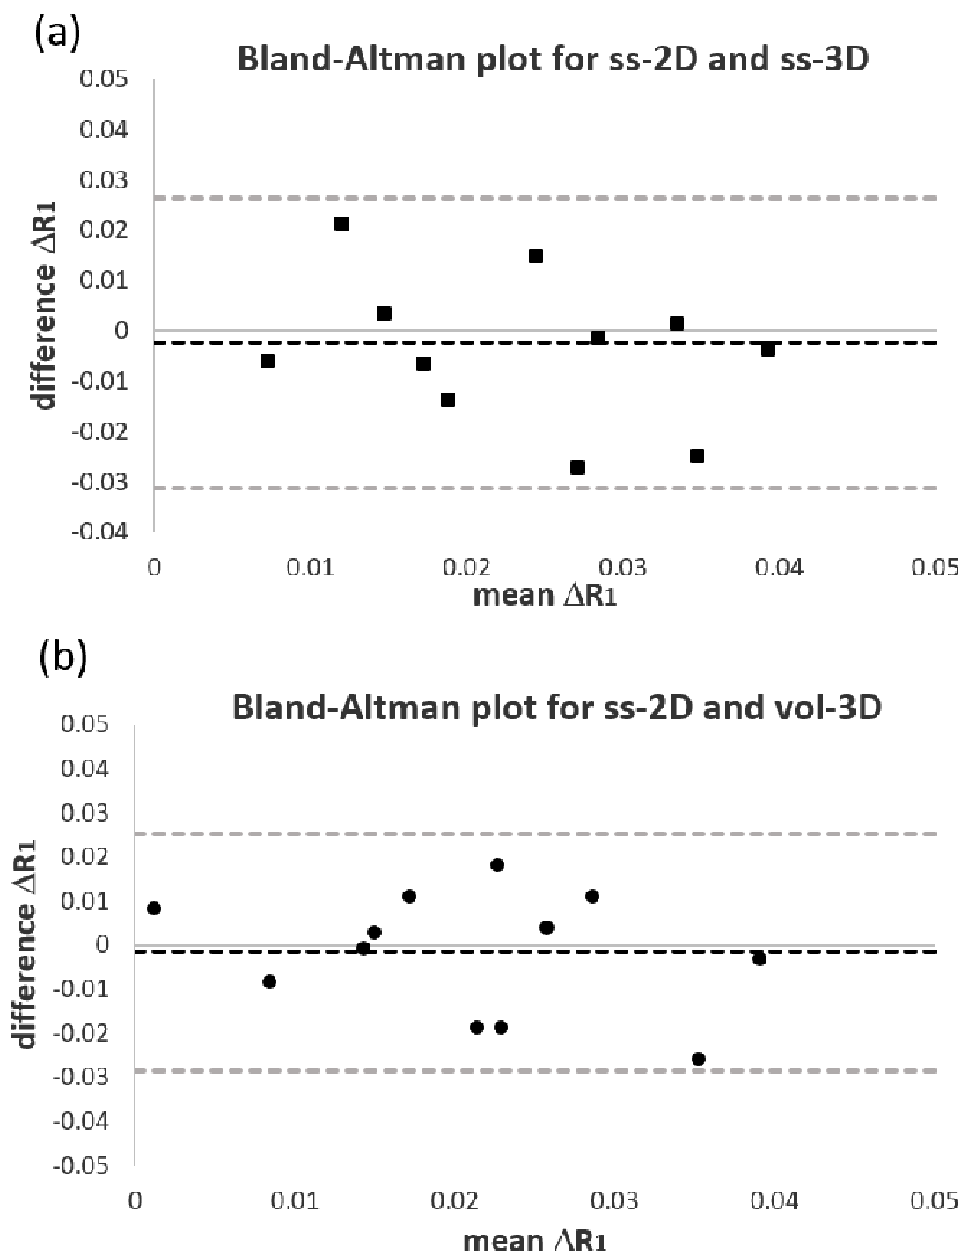

148

149 **Figure 2** Bland–Altman plots of mean  $\Delta R_1$  against the difference between 2D and 3D  $\Delta R_1$  for (a) ss-2D  
150 and ss-3D and (b) ss-2D and vol-3D. The black dotted line represents the mean difference and the  
151 grey dotted lines the limits of agreement (95% confidence interval).

152

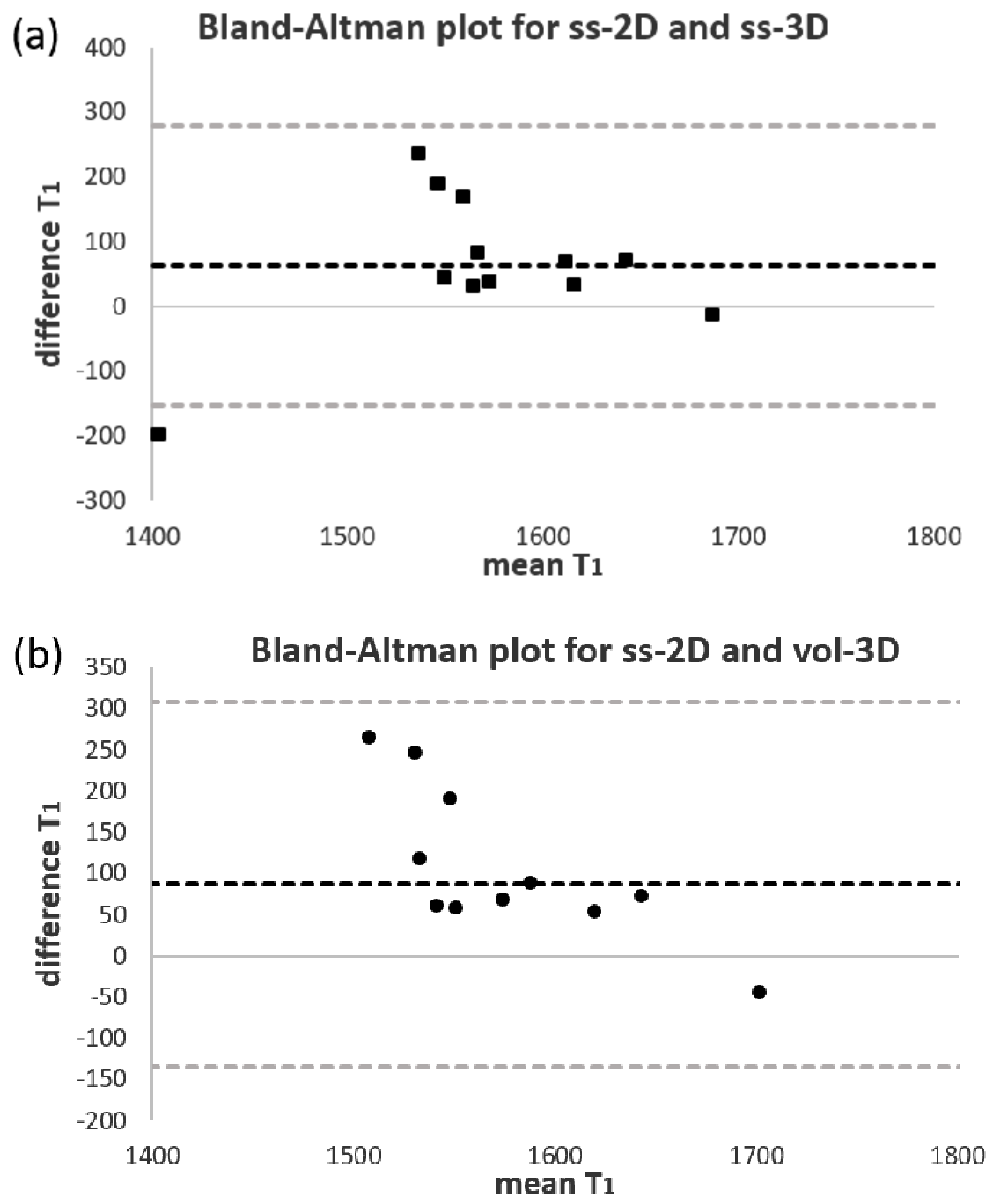

153

154 **Figure 3** Bland–Altman plots of mean  $T_{1b}$  against the difference between 2D and 3D  $T_{1b}$  for (a) ss-2D  
155 and ss-3D and (b) ss-2D and vol-3D. The black dotted line represents the mean difference and the  
156 grey dotted lines the limits of agreement (95% confidence interval).

157

158 Figure 4 shows maps comparing the voxel-wise  $\Delta R_1$  for ss-2D and a matching slice from the 3D  
159 volume for an example anterior (Figures 4a and 4b) and posterior (Figures 4c and 4d) placenta. The

160 3D images exhibit similar features to the 2D maps for both of the placenta, however there are  
161 amplitude differences for the posterior placenta. Qualitatively, the ss-3D and vol-3D maps are less  
162 noisy and more blurred.

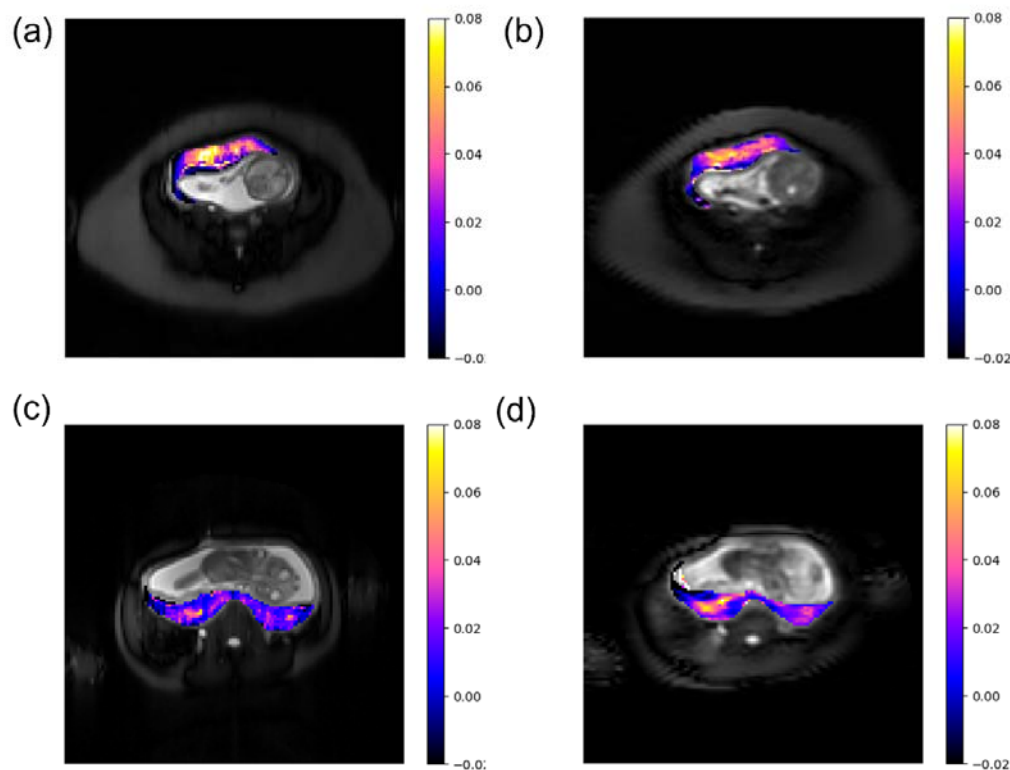

163  
164 **Figure 4** *Top*:  $\Delta R_1$  ( $s^{-1}$ ) maps of an example anterior placenta for (a) ss-2D and a matching (b) ss-3D;  
165 *Bottom*:  $\Delta R_1$  ( $s^{-1}$ ) maps of an example posterior placenta for (a) ss-2D and a matching (b) ss-3D.

166

167

168

169

170

171 **Discussion**

172 This study shows that it is feasible to acquire whole placental volume OE-MRI data on a Philips 1.5 T  
173 MRI scanner. All scans were well tolerated by the pregnant subjects, even though increasing the  
174 coverage to 3D required the use of a cardiac-receiver coil in addition to the non-rebreathing mask.

175 There were no significant differences between median  $\Delta R_1$  for the original single slice 2D protocol  
176 (ss-2D) compared with a matched single slice from the 3D data (ss-3D) or the full 3D volume (vol-  
177 3D), the individual difference between the 2D and 3D data was on the same order of magnitude as  
178 the group average and showed some scatter. All subjects fall within the limit of agreement (95% CI)  
179 on the  $\Delta R_1$  Bland–Altman plots in Figure 2. Only subject 1 falls outside the limit for the ss-2D v ss-3D  
180 comparison of  $T_{1b}$  (Figure 3). This subject has  $T_{1b}$  in the normal range for ss-3D and vol-3D, but the  
181 2D data shows a low median  $T_{1b}$  (ss-2D 1305 ms compared to an average of 1603 ms).

182 Previous studies have shown a negative correlation of  $\Delta R_1$  (1–3) and  $T_{1b}$  (11,12) with gestational age  
183 at scan. Here no correlation was significant in this study. However, this study included a relatively  
184 small group of subjects (10 compared with between 9(2) and 41(12)) and much smaller gestational  
185 window (169-196 days compared with up to 145-2671 days(2)). The study cohort was primarily  
186 chosen to allow the quality of the data acquired using the 3D protocol to be compared with that of  
187 the original 2D protocol, not to test for correlation with gestation. However, a negative trend in IQR  
188  $\Delta R_1$  and IQR  $T_{1b}$  was apparent for 3D data (Table 2) corresponding to a reduction in heterogeneity  
189 with gestation. The two subjects that were removed from correlation of median  $R_1$  with gestational  
190 age at scan, due to an IBR < 5%, had relatively low or abnormal  $\Delta R_1$ . This is in qualitative agreement  
191 with the results of (3) (see maps in supplementary material – subjects 5 and 9), however the number  
192 of subjects is too small to perform a quantitative comparison.

193 Figure 4 shows that the underlying images are of poorer quality for the 3D data (b and d) than for  
194 the 2D data (a and c), with more artefact and significant  $T_2$  blurring due to the long echo train and/or  
195 undersampling. However, similar features are observed for both the 2D and 3D  $\Delta R_1$  maps.  $\Delta R_1$

196 appears to be greater in the intermediate section of the placenta, with a decreasing gradient  
197 towards both the fetal and maternal sides. The 3D  $\Delta R_1$  video maps in supplemental material show  
198 that the gradient is observable throughout the extent of the placenta. The higher values of  $\Delta R_1$   
199 appear in the intermediate region where the villous tree exchanges oxygen between the maternal  
200 and fetal blood(13). This gradient may be visible as a result of the higher signal-to-noise ratio of the  
201 3D volume acquisition compared with the 2D, but it may be artificially enhanced by partial volume  
202 effects at the boundary between the placenta and the surrounding tissue due to image blurring. No  
203 statistically significant difference in the heterogeneity measurement IQR between the 2D and the 3D  
204  $\Delta R_1$  data was observed, however the correlation of IQR with gestational age shows a statistically  
205 significant decrease for both the ss-3D ( $p = 0.03$ ) and vol-3D ( $p = 0.005$ ), but not for ss-2D. This may  
206 be a result of an overall lower  $\Delta R_1$  at later gestation leading to a smaller range or it may reflect a real  
207 increase in the homogeneity of oxygenation with increasing gestation to which the 3D data is  
208 sensitive.

209 There are number of limitations of the study. Firstly, the ROI was drawn on the TI = 300ms and  
210 applied to the dynamic series of data. The use of the 300ms data for region definition allowed the  
211 placenta to be differentiated more clearly, however any gross motion between this scan and the  
212 dynamic acquisition used to calculate  $\Delta R_1$  could have a detrimental effect on the resulting maps and  
213 statistics. Secondly, unlike in previous OE-MRI studies (2,3) where the ROI has been trimmed to only  
214 include voxels where placental tissue was present throughout the whole dynamic, the placental  
215 volume for each slice was included without trimming. Care was taken on the fetal side of the  
216 placenta to not include approximately one voxel around the amniotic sac to reduce the effects of  
217 fetal motion. Any significant motion was accepted as noise on the  $\Delta R_1$  curve, with the intention of  
218 not unnecessarily removing placental tissue and biasing the analysis by drawing small ROIs. Thirdly,  
219 the 3D protocol was updated during the study to match the dimensions of the 2D protocol. This does  
220 not appear to have any significant effect on the quality of the data or the resulting maps, but the  
221 number of scans with the updated protocol is too small to test for any bias. Finally, the slice

222 matching to obtain the ss-3D data was performed by using the slice location from the DICOM  
223 header. This does not take into account gross motion between scans and is only an approximate due  
224 to even number of slices in 3D.

225 The aetiology of FGR is variable with specific phenotypes due to chromosomal, infectious, vascular  
226 disease and inflammatory-related causes. It is hoped that whole volume OE-MRI acquisition may  
227 allow for in utero placental phenotyping in FGR, thereby improving disease stratification, therapeutic  
228 intervention and outcome management. FGR placentas are known to have poor peripheral  
229 vascularisation and visible hypo-vascular regions(6) Other gross lesions evident in maternal vascular  
230 malperfusion include placental hypoplasia, infarction and altered villous development(14). These  
231 abnormalities are likely to lead to heterogeneity in the oxygenation across the placental volume that  
232 will be more readily observable when imaging the whole placental volume as opposed to a single  
233 central slice. A reliable measure of placental oxygenation across the entire placenta is a welcome  
234 addition to the MRI toolbox and could be utilised with other clinical markers and imaging to aid  
235 identification of the placental phenotype of FGR and improve fetal outcomes. Here we show that it  
236 is possible to obtain a measure of oxygenation via  $\Delta R_1$  across the entire placenta. The 3D OE-MRI  
237 measurement is sensitive to changes in placental oxygenation and allow mapping of the whole  
238 placental volume.

### 239 **Acknowledgments**

240 This project was funded by Tommy's the baby charity. MRI scans were undertaken within Wolfson  
241 Molecular Imaging Centre.

242

### 243 **References**

244 1. Huen I, Morris DM, Wright C, Parker GJM, Sibley CP, Johnstone ED, et al. R1 and R2\* changes  
245 in the human placenta in response to maternal oxygen challenge. Magn Reson Med.

- 246            2013;70(5):1427–33.
- 247    2.    Ingram E, Hawkins L, Morris DM, Myers J, Sibley CP, Johnstone ED, et al. R1 changes in the  
248            human placenta at 3 T in response to a maternal oxygen challenge protocol. *Placenta*  
249            [Internet]. 2016;39:151–3. Available from: <http://dx.doi.org/10.1016/j.placenta.2016.01.016>
- 250    3.    Ingram E, Morris D, Naish J, Myers J, Johnstone E. MR Imaging Measurements of Altered  
251            Placental Oxygenation in Pregnancies Complicated by Fetal Growth Restriction. *Radiology*  
252            [Internet]. 2017 Dec;285(3):953–60. Available from:  
253            <http://pubs.rsna.org/doi/10.1148/radiol.2017162385>
- 254    4.    Pallotto EK, Kilbride HW. Perinatal outcome and later implications of intrauterine growth  
255            restriction. *Clin Obstet Gynecol*. 2006;49(2):257–69.
- 256    5.    Bernstein IM, Horbar JD, Badger GJ, Ohlsson A, Golan A. Morbidity and mortality among very-  
257            low-birth-weight neonates with intrauterine growth restriction. *Am J Obstet Gynecol*.  
258            2000;182(1 Pt 1):198–206.
- 259    6.    Junaid TO, Brownbill P, Chalmers N, Johnstone ED, Aplin JD. Fetoplacental vascular alterations  
260            associated with fetal growth restriction. *Placenta*. 2014 Oct 1;35(10):808–15.
- 261    7.    Toal M, Keating S, Machin G, Dodd J, Adamson SL, Windrim RC, et al. Determinants of adverse  
262            perinatal outcome in high-risk women with abnormal uterine artery Doppler images. *Am J*  
263            *Obstet Gynecol*. 2008;198(3):330.e1-330.e7.
- 264    8.    Daayana S, Sci M, Baker P, Crocker I. An Image Analysis Technique for the Investigation of  
265            Variations in Placental Morphology in Pregnancies Complicated by Preeclampsia With and  
266            Without Intrauterine Growth Restriction. Vol. 11, *Soc Gynecol Investig*. 2004.
- 267    9.    Gardosi J. Customized Fetal Growth Standards: Rationale and Clinical Application. *Semin*  
268            *Perinatol*. 2004;28(1):33–40.



- 269 10. Figueras F, Gratacós E. Update on the diagnosis and classification of fetal growth restriction  
270 and proposal of a stage-based management protocol. *Fetal Diagn Ther.* 2014;36(2):86–98.
- 271 11. Wright C, Morris DM, Baker PN, Sci B, Frcog DM, Crocker IP, et al. Magnetic Resonance  
272 Imaging Relaxation Time Measurements of the Placenta at 1.5 T Europe PMC Funders Group.  
273 Placenta [Internet]. 2011 [cited 2018 Sep 3];32(12):1010–5. Available from:  
274 <http://europepmc.org/backend/ptpmcrender.fcgi?accid=PMC3588143&blobtype=pdf>
- 275 12. Gowland PA, Freeman A, Issa B, Boulby P, Duncan KR, Moore RJ, et al. In vivo relaxation time  
276 measurements in the human placenta using echo planar imaging at 0.5 T. *Magn Reson*  
277 *Imaging.* 1998;16(3):241–7.
- 278 13. Slator PJ, Hutter J, McCabe L, Gomes ADS, Price AN, Panagiotaki E, et al. Placenta  
279 microstructure and microcirculation imaging with diffusion MRI. *Magn Reson Med.*  
280 2018;80(2):756–66.
- 281 14. Ernst LM. Maternal vascular malperfusion of the placental bed. *APMIS.* 2018;126(7):551–60.  
282

## Dynamic $\Delta R_1$ curves

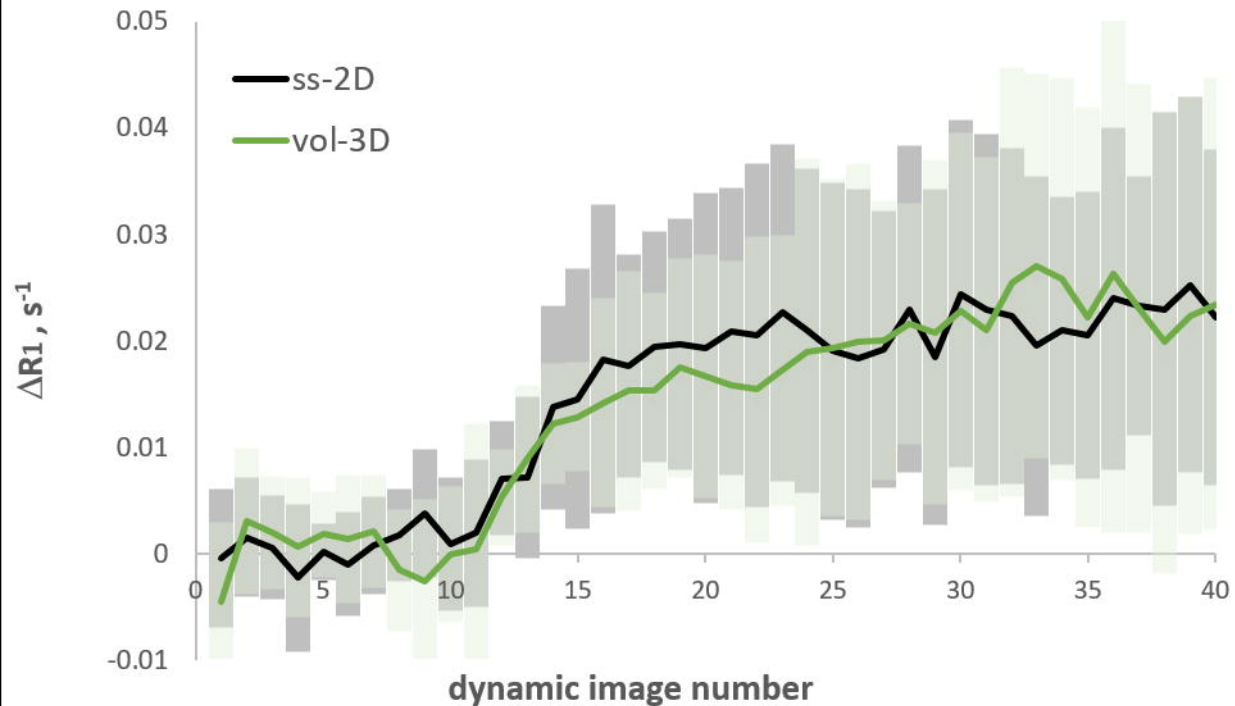

(a)

Bland-Altman plot for ss-2D and ss-3D

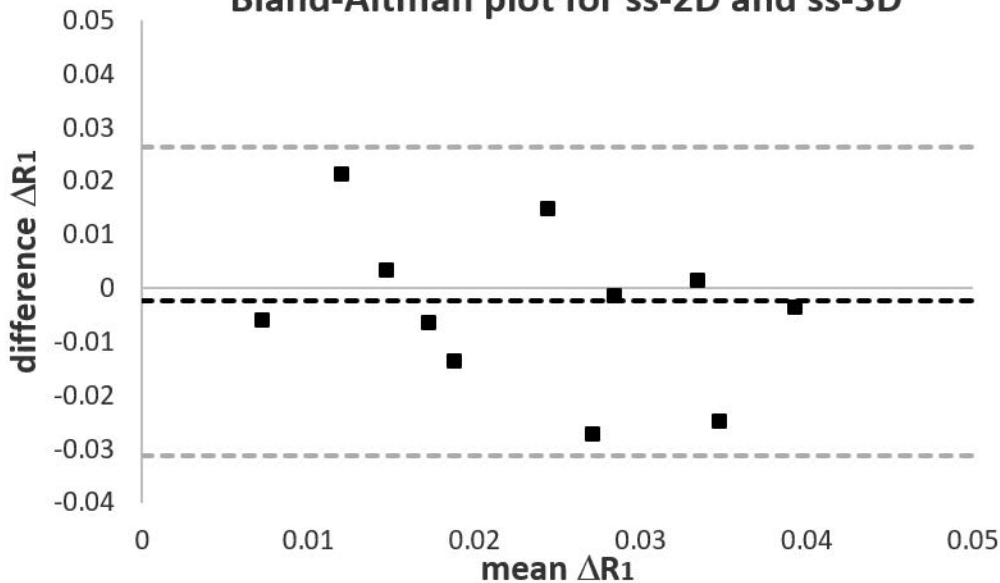

(b)

Bland-Altman plot for ss-2D and vol-3D

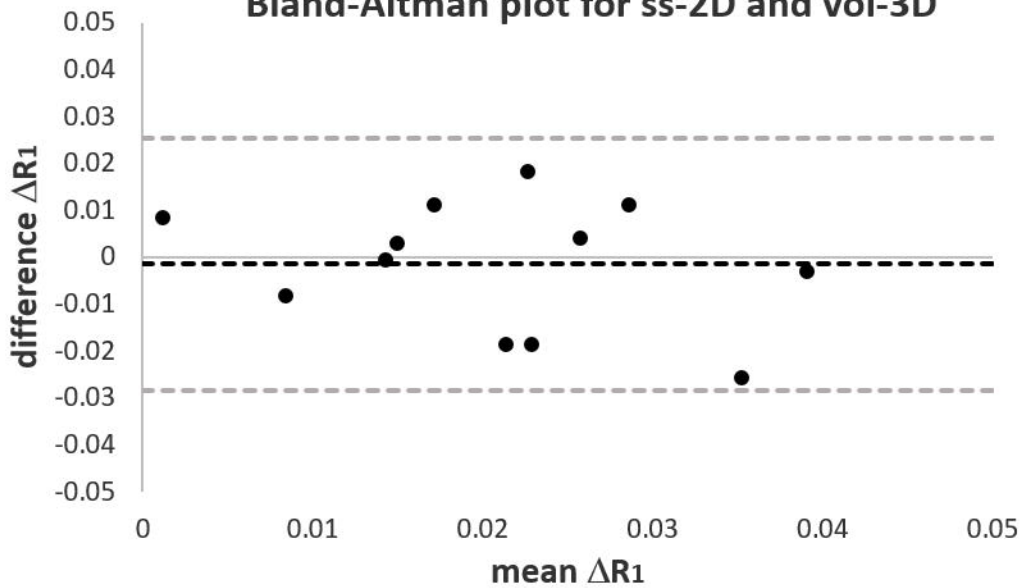

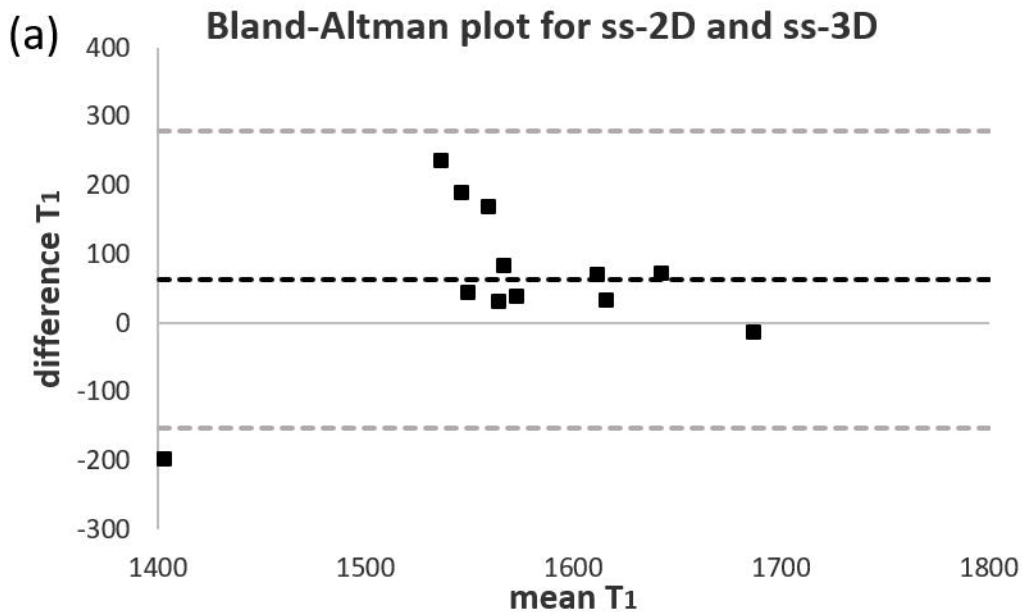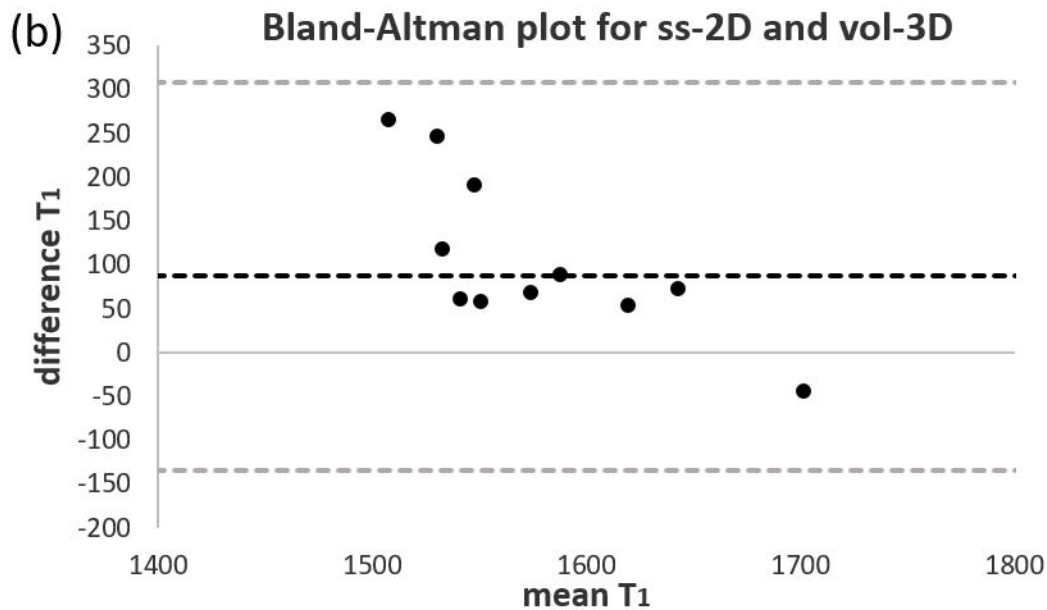

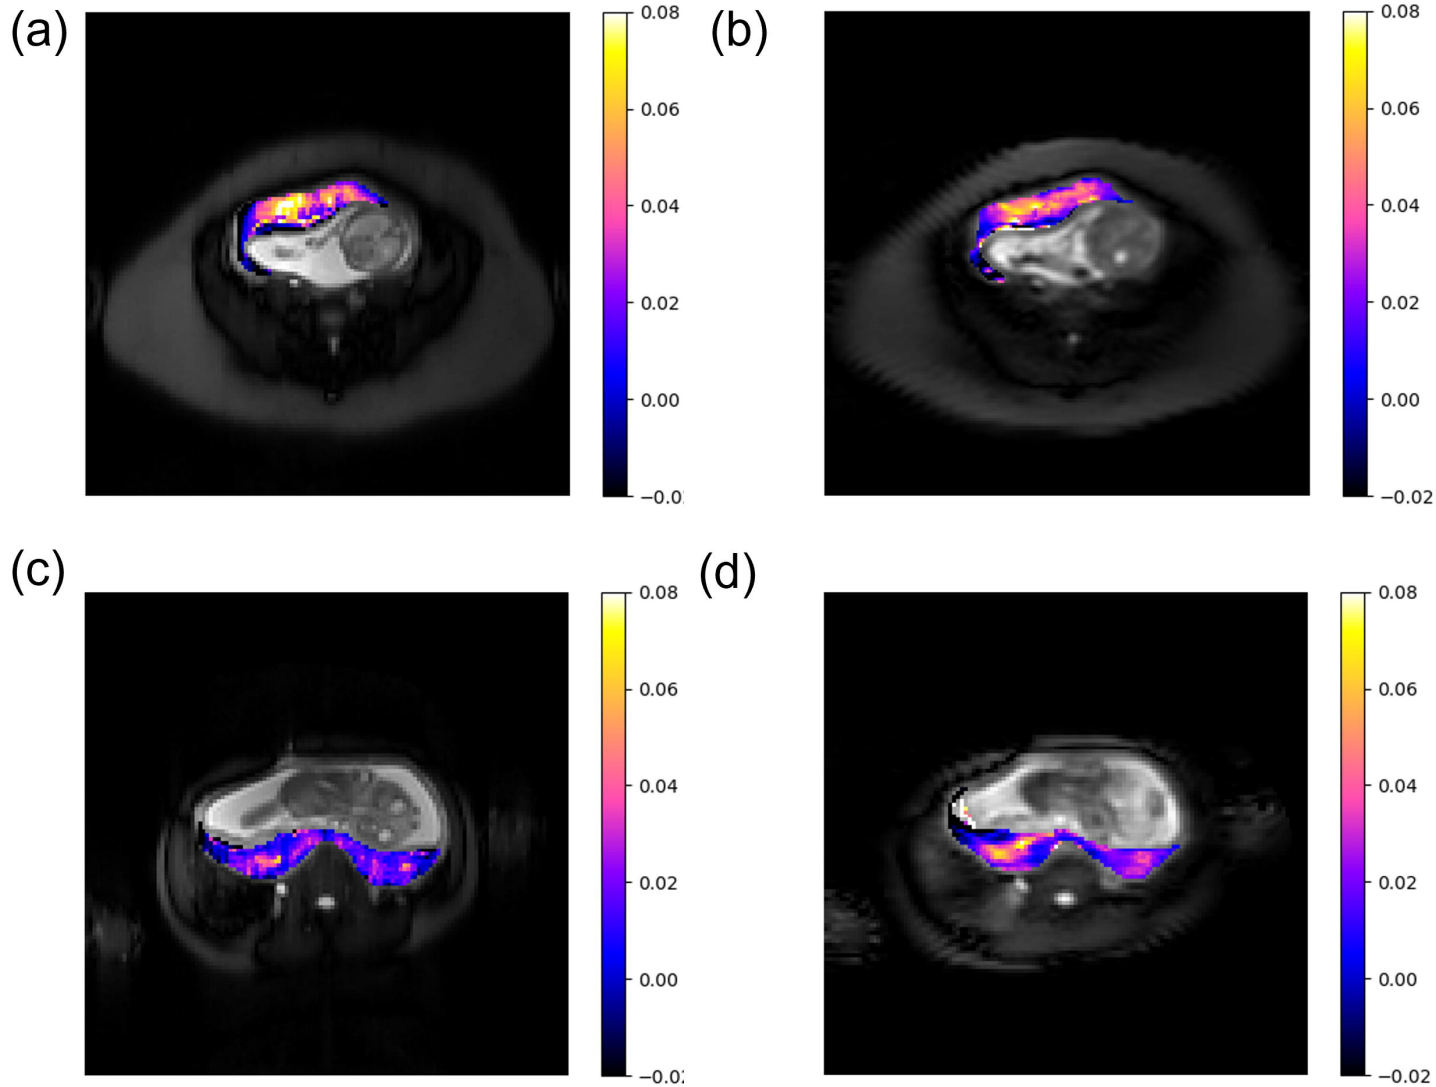

Source: https://medrxiv.org/content/10.1101/2023.03.17.23287353v1.full.pdf
